# Supplementary material
Source: PubMed Central journal article supplement (PMC3670084)
Supplement: NIHMS47258-supplement-01.pdf [file NIHMS47258-supplement-01.pdf]

**eAppendix to Lipsitch et al. Estimating rates of carriage acquisition and clearance and competitive ability for pneumococcal serotypes in Kenya with a Markov transition model.**

eTable 1: Observations used in the analysis

| <b>Observation</b>                                                            | <b>n (total = 2840 persons)</b>                                                                                                     |
|-------------------------------------------------------------------------------|-------------------------------------------------------------------------------------------------------------------------------------|
| Uncolonized at baseline                                                       | 972 (34% of all persons)                                                                                                            |
| Colonized at baseline, <3 swabs (could not evaluate for time to event)        | 390 (14% all persons)                                                                                                               |
| Colonized at baseline, 3 or more swabs (could be evaluated for time to event) | 1478 (52% of all persons)                                                                                                           |
| Colonized at baseline, no transition observed before end of follow up         | 421 (28% of persons with 3 or more swabs)                                                                                           |
| Clearance observed                                                            | 444 (30% of persons with 3 or more swabs)<br><br>Of these: 292 (66%) with two consecutive negative swabs at the end of carriage     |
| Change of serotype observed                                                   | 613 (42% of persons with 3 or more swabs)<br><br>Of these: 322 (53%) with two consecutive identical swabs showing same new serotype |

eTable 2: Transitions between pairs of serotypes that occurred more often than expected by chance in 95% of cases.

| Serotype Transition  | Expectation        | Observation minus expectation |
|----------------------|--------------------|-------------------------------|
| <b>15B -&gt; 15C</b> | <b>1.765329296</b> | <b>16.2346707</b>             |
| <b>15C -&gt; 15B</b> | <b>1.635124905</b> | <b>10.36487509</b>            |
| 19F -> 35B           | 7.249810749        | 9.750189251                   |
| <b>35B -&gt; 35A</b> | <b>0.698713096</b> | <b>9.301286904</b>            |
| <b>6B -&gt; 6A</b>   | <b>10.78046934</b> | <b>9.219530659</b>            |
| 23F -> 6A            | 8.965934898        | 9.034065102                   |
| <b>6A -&gt; 6B</b>   | <b>9.286146858</b> | <b>7.713853142</b>            |
| <b>23A -&gt; 23B</b> | <b>0.882664648</b> | <b>7.117335352</b>            |
| 7C -> 20             | 0.508705526        | 6.491294474                   |
| <b>23F -&gt; 23A</b> | <b>1.398940197</b> | <b>5.601059803</b>            |
| <b>35A -&gt; 35B</b> | <b>0.554125662</b> | <b>5.445874338</b>            |
| 6B -> 14             | 3.822861469        | 5.177138531                   |
| 7C -> 19F            | 3.342922029        | 4.657077971                   |
| <b>23B -&gt; 23A</b> | <b>0.749432248</b> | <b>4.250567752</b>            |
| <b>19A -&gt; 19B</b> | <b>0.849356548</b> | <b>4.150643452</b>            |
| 35B -> 9V            | 1.881150643        | 4.118849357                   |
| 20 -> 7C             | 0.472369417        | 3.527630583                   |
| 10A -> 6A            | 4.482967449        | 3.517032551                   |
| 19F -> 18C           | 2.020439061        | 2.979560939                   |
| 19F -> 33D           | 2.020439061        | 2.979560939                   |
| 23F -> 21            | 1.144587434        | 2.855412566                   |
| 33B -> 33D           | 0.167297502        | 2.832702498                   |
| 15A -> 10A           | 1.308099924        | 2.691900076                   |
| 9V -> 15C            | 1.323996972        | 2.676003028                   |
| <b>35F -&gt; 35B</b> | <b>0.369417108</b> | <b>2.630582892</b>            |
| 35B -> 24F           | 0.42997729         | 2.57002271                    |
| 16F -> 6B            | 1.448902347        | 2.551097653                   |
| <b>23B -&gt; 23F</b> | <b>2.452687358</b> | <b>2.547312642</b>            |
| 34 -> 11A            | 1.53671461         | 2.46328539                    |
| 21 -> 14             | 0.567751703        | 2.432248297                   |
| 18F -> 15A           | 0.046934141        | 1.953065859                   |
| 33D -> 33B           | 0.063588191        | 1.936411809                   |
| 10A -> 10F           | 0.127176382        | 1.872823618                   |
| 18C -> 24F           | 0.139288418        | 1.860711582                   |
| 20 -> 4              | 0.163512491        | 1.836487509                   |
| <b>35B -&gt; 35F</b> | <b>0.268735806</b> | <b>1.731264194</b>            |
| 6B -> 5              | 0.535200606        | 1.464799394                   |
| 28A -> 28F           | 0.002271007        | 0.997728993                   |
| <b>19C -&gt; 19A</b> | <b>0.070401211</b> | <b>0.929598789</b>            |

Bold rows indicate within-serogroup pairs that may reflect high-frequency switching or errors in the last step of serotyping.

eFigure 1: Reduction in time to clearance from the youngest to the oldest terciles, versus time to clearance in the youngest tercile (log-log plot). The strong negative correlation suggests that with age, the more rapid immune clearance of carriage has a greater proportional effect on long-carried serotypes.

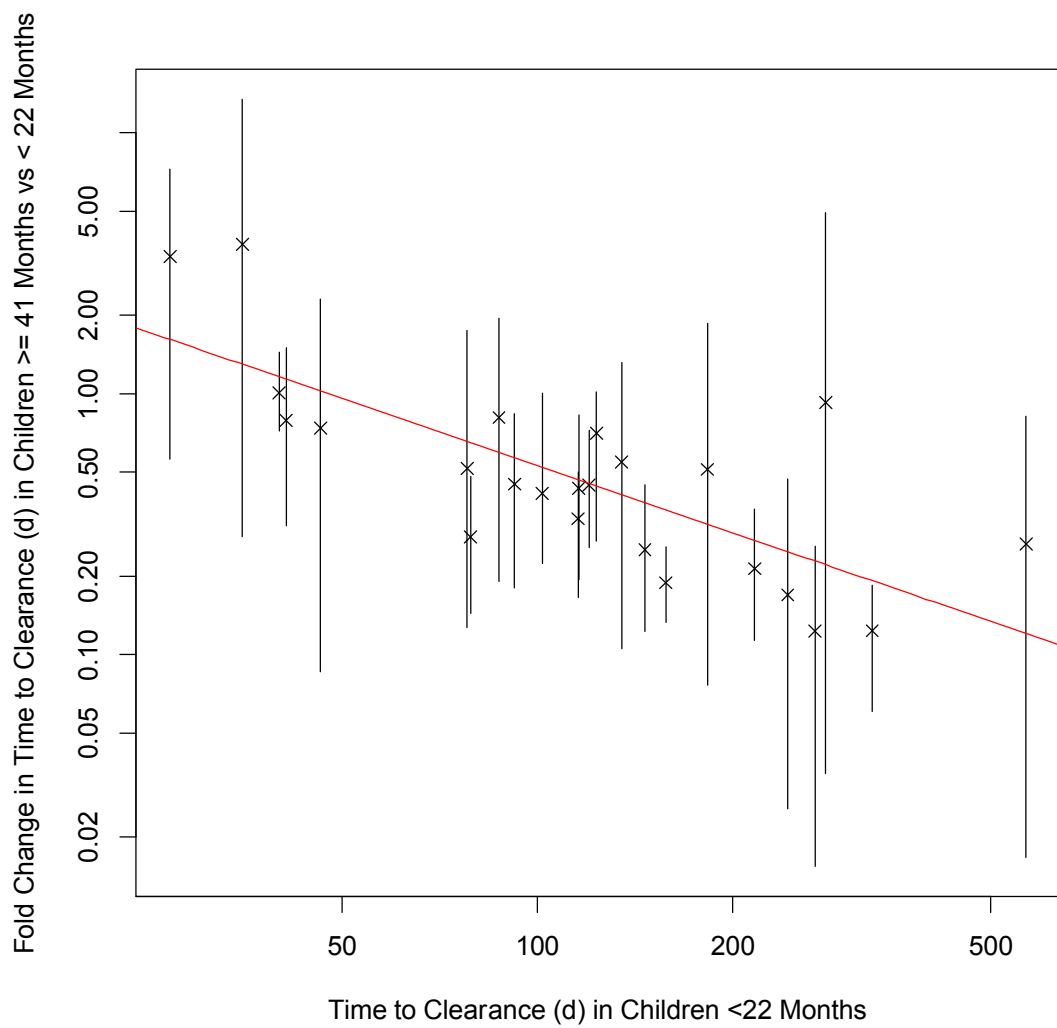

### **Electronic availability of data:**

We have included R objects that correspond to each of the model fits mentioned in this paper.

The full-data fit is called `multi_res_fit_sigma_revision.RData`, and the separate fits by age tercile have similar names with the terciles of age (1=youngest; 3=oldest).

When loaded into R, these appear as an object named "fit". The "fit" object has several slots:

`fit$res`: Table of parameter estimates with asymptotic 95% confidence intervals for each.

`fit$init`: Vector of fitted prevalence estimates for each of the serotypes and the uncolonized state.

`fit$sigma`: Asymptotic covariance matrix which can be used to simulate from the asymptotic sampling distribution of the maximum likelihood log-parameter estimators (or the approximate posterior distribution of the parameters from a Bayesian perspective) to compute the sampling distribution of other quantities of interest (details below). Alternatively, this covariance matrix can be used for Delta method calculations.

`fit$loglik`: Log-likelihood value at the parameter estimates.

`fit$optim.res`: List returned by the `optim` routine used to fit the model. Contains additional convergence information and the numerical Hessian.

`fit$init`: Initial value of each of the parameters when the optimizer was initialized.

Example:

To simulate from the asymptotic sampling distribution of the whole set of parameters:

```
> library(mvtnorm)
> rmvnorm(100, log(fit$res[1,]), fit$sigma))
```

Note that the covariance matrix corresponds to the sampling distribution of the log-parameters, so the normal distributions is centered at the log of the maximum likelihood estimates.
